# Supplementary material for: External validation and comparison of simple tools to screen for nonalcoholic fatty liver disease in Chinese community population
Source: PubMed Central journal article supplement — Eur J Gastroenterol Hepatol. 2022 Jul 8;34(8):865–72. doi: 10.1097/MEG.0000000000002399 (PMC9273302; doi:10.1097/meg.0000000000002399), 2022-07-08
Supplement: ejgh-34-865-s001.pdf [file ejgh-34-865-s001.pdf]

## Supplemental material

**Table S1** The odd ratios (OR) of one unit increment of NAFLD-related indexes for mild, moderate and severe NAFLD.

| Models | Mild NAFLD              |                                        | Moderate NAFLD          |                                        | Severe NAFLD            |                                        |
|--------|-------------------------|----------------------------------------|-------------------------|----------------------------------------|-------------------------|----------------------------------------|
|        | OR (95%CI) <sup>a</sup> | Adjusted OR<br>(95%CI) <sup>a, b</sup> | OR (95%CI) <sup>a</sup> | Adjusted OR<br>(95%CI) <sup>a, b</sup> | OR (95%CI) <sup>a</sup> | Adjusted OR<br>(95%CI) <sup>a, b</sup> |
| FLI    | 1.06 (1.05, 1.07)       | 1.04 (1.03, 1.05)                      | 1.09 (1.08, 1.10)       | 1.08 (1.07, 1.10)                      | 1.10(1.09, 1.12)        | 1.09 (1.07, 1.11)                      |
| FLD    | 1.42 (1.38, 1.47)       | 1.50 (1.41, 1.60)                      | 1.74 (1.66, 1.81)       | 2.10 (1.94, 2.29)                      | 1.87 (1.76, 2.00)       | 2.15 (1.93, 2.41)                      |
| ZJU    | 1.42 (1.38, 1.46)       | 1.44 (1.36, 1.52)                      | 1.73 (1.66, 1.81)       | 1.85 (1.72, 1.99)                      | 1.85 (1.74, 1.97)       | 1.89 (1.72, 2.07)                      |
| LAP    | 1.05 (1.05, 1.06)       | 1.03 (1.02, 1.03)                      | 1.07 (1.06, 1.07)       | 1.04 (1.03, 1.05)                      | 1.07 (1.06, 1.07)       | 1.04 (1.03, 1.05)                      |
| CAP    | 1.07 (1.06, 1.07)       | 1.09 (1.06, 1.12)                      | 1.10 (1.09, 1.11)       | 1.23 (1.19, 1.27)                      | 1.12(1.11, 1.13)        | 1.24 (1.19, 1.30)                      |
| WHtR   | 1.27 (1.24, 1.30)       | 1.10 (1.07, 1.14)                      | 1.41 (1.36, 1.45)       | 1.19 (1.14, 1.25)                      | 1.56 (1.47, 1.65)       | 1.29 (1.20, 1.39)                      |
| TyG    | 5.96 (5.01, 7.08)       | 3.68 (3.02, 4.47)                      | 12.56 (9.90, 15.92)     | 8.65 (6.60, 11.35)                     | 14.62 (10.23, 20.88)    | 9.59 (6.37, 14.45)                     |
| VAI    | 1.95 (1.81, 2.11)       | 1.51 (1.40, 1.63)                      | 2.24 (2.06, 2.44)       | 1.72 (1.58, 1.87)                      | 2.29 (2.09,2.50)        | 1.76 (1.60, 1.92)                      |

<sup>a</sup> all  $P < 0.001$ ; <sup>b</sup> adjusted for sex, age and BMI.

Abbreviations: OR, odd ratio; NAFLD, nonalcoholic fatty liver disease; FLI, fatty liver index; FLD, fatty liver disease index; ZJU, Zhejiang University index; TyG, triglyceride and glucose index; CAP, controlled attenuation parameter; LAP, lipid accumulation product; WHtR, waist-to-height ratio; VAI, visceral adiposity index.

**Table S2** Cut-off values and diagnostic accuracy of FLI and FLD in total, male and female population

| Model | Total   |                 |                 | Male    |                 |                 | Female  |                 |                 |
|-------|---------|-----------------|-----------------|---------|-----------------|-----------------|---------|-----------------|-----------------|
|       | Cut-off | Sensitivity (%) | Specificity (%) | Cut-off | Sensitivity (%) | Specificity (%) | Cut-off | Sensitivity (%) | Specificity (%) |
| FLI   | 13.5    | 90.0            | 60.6            | 16.5    | 90.0            | 55.1            | 7.3     | 90.0            | 73.7            |
|       | 37.6    | 54.3            | 90.0            | 45.8    | 48.0            | 90.0            | 14.1    | 65.0            | 90.0            |
| FLD   | 27.2    | 90.0            | 38.6            | 27.6    | 90.0            | 53.6            | 26.0    | 90.0            | 73.5            |
|       | 30.9    | 54.8            | 90.0            | 31.6    | 50.1            | 90.0            | 27.9    | 66.3            | 90.0            |

Abbreviations: FLI, fatty liver index; FLD, fatty liver disease index.
